# Supplementary material for: Manipulation of a VEGF-Notch signaling circuit drives formation of functional vascular endothelial progenitors from human pluripotent stem cells
Source: PubMed Central journal article supplement — Cell Res. 2014 May 9;24(7):820–41. doi: 10.1038/cr.2014.59 (PMC4085760; doi:10.1038/cr.2014.59), 2014-05-09
Supplement: cr201459x1.pdf [file cr201459x1.pdf]

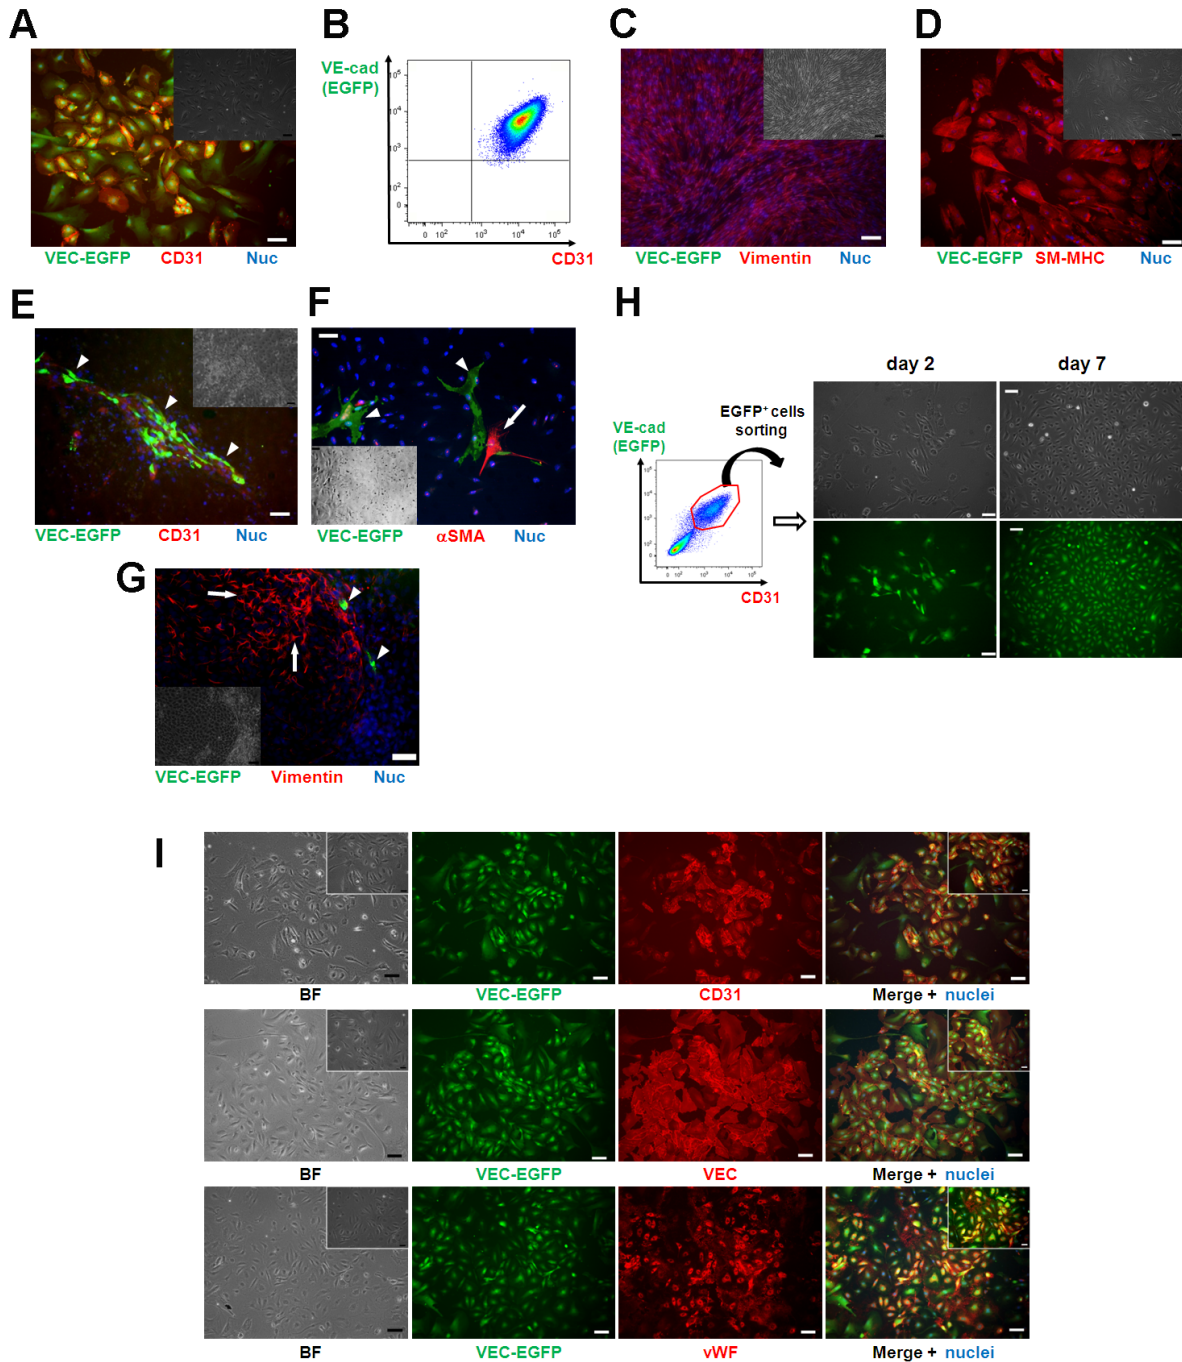

**Supplementary information, Figure S1** Specific expression of VEC-EGFP in human endothelial lineage cells.

(A and B) Human umbilical vein endothelial cells (HUVECs) transduced with a VEC-EGFP lentiviral vector showed clear expression of EGFP, along with the coexpression of a pan-endothelial marker CD31 (A). FACS analysis demonstrated that these cells were double-positive for VEC (EGFP) and CD31 (B). (C and D) Human foreskin fibroblasts (C,

vimentin-positive) or arterial smooth muscle cells (**D**, SM-MHC-positive) transduced with VEC-EGFP never expressed EGFP. (**E**) The differentiating VEC-EGFP<sup>+</sup> hESCs (arrowheads) coexpressed CD31. (**F** and **G**) The differentiating VEC-EGFP<sup>+</sup> hESCs (arrowheads) did not express alpha-smooth muscle actin ( $\alpha$ -SMA) (**F**) or vimentin (**G**). Arrows indicate  $\alpha$ -SMA-positive (**F**) or vimentin-positive (**G**) differentiated cells. (**H**) The hESC-derived VEC-EGFP<sup>+</sup> cells sorted with FACS were seeded on the plates and then proliferated rapidly over the dates. Scale bars, 50  $\mu$ m (**E**, **F**, and **G**) and 100  $\mu$ m (**A**, **C**, **D**, and **H**). (**I**) Immunofluorescence studies shows the hESC-derived VEC-EGFP<sup>+</sup> cells expressed the typical endothelial antigens, CD31 (top), endogenous VEC (middle) and vWF (bottom), which are indicated as red signals. Scale bars, 50  $\mu$ m (insets) and 100  $\mu$ m.
