# Supplementary material for: Manipulation of a VEGF-Notch signaling circuit drives formation of functional vascular endothelial progenitors from human pluripotent stem cells
Source: PubMed Central journal article supplement — Cell Res. 2014 May 9;24(7):820–41. doi: 10.1038/cr.2014.59 (PMC4085760; doi:10.1038/cr.2014.59), 2014-05-09
Supplement: cr201459x2.pdf [file cr201459x2.pdf]

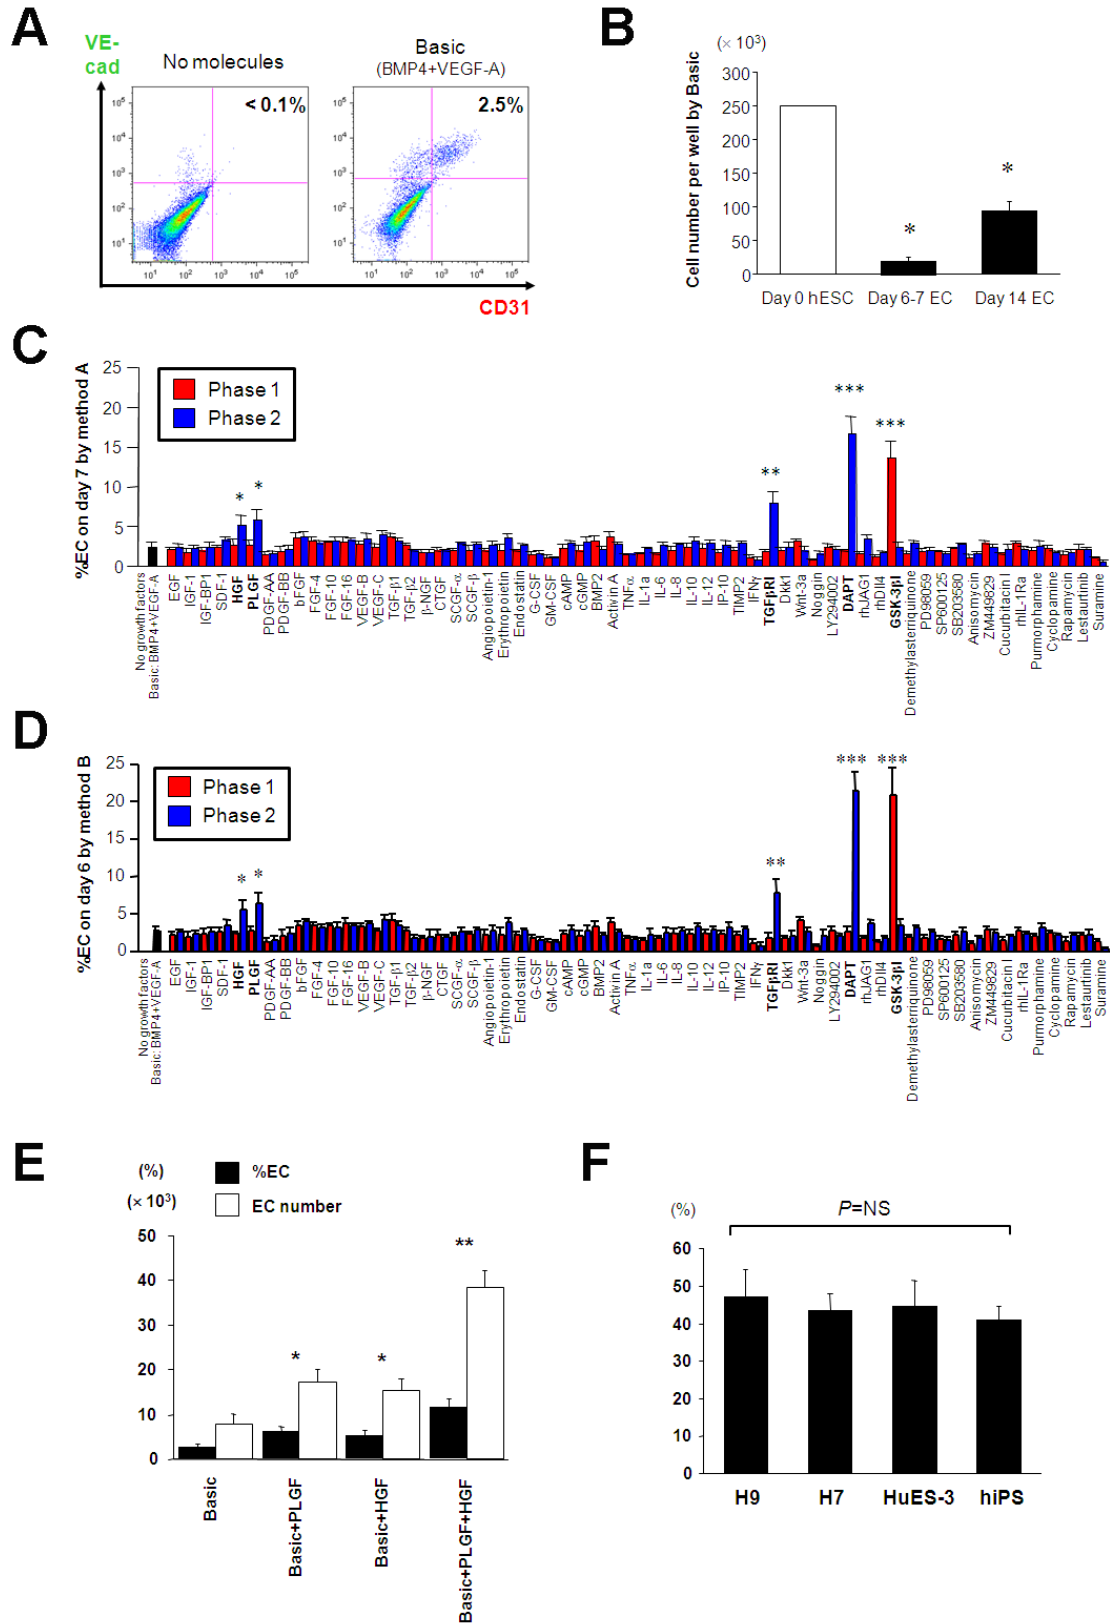

Supplementary information, Figure S2 Screening of bioactive small molecules for endothelial differentiation.

(A) Representative FACS results detecting the VEC-EGFP<sup>+</sup>CD31<sup>+</sup> ECs at the end of phase 2 when no molecules (*left*) or basic molecules (BMP4 plus VEGF-A; *right*) were administered in the culture of the endothelial differentiation. The induction ratio of VEC<sup>+</sup>CD31<sup>+</sup> ECs by BMP4 with VEGF-A was only 1–3%. (B) The yields of VEC<sup>+</sup>CD31<sup>+</sup> ECs generated with BMP4 plus VEGF-A at the end of phase 2 (day 6–7) and phase 3 (day 14) were less than the initial number of hESCs before differentiation. \**P*<0.01 vs day 0 hESC. (C and D) The ratios of VEC<sup>+</sup>CD31<sup>+</sup> ECs at the end of phase 2, induced by all the bioactive chemical molecules tested in the method A (C) and method B (D). Among them, a  $\gamma$ -secretase inhibitor DAPT in phase 2 and a GSK-3 $\beta$  inhibitor (GSK-3 $\beta$ I; BIO or CP21R7) in phase 1 proved the significantly-enhanced endothelial differentiation. A TGF $\beta$  inhibitor (SB431542), HGF and PLGF in phase 2 also showed their modest efficacies, respectively. \**P*<0.05, \*\**P*<0.01, and \*\*\**P*<0.0001 vs Basic (BMP4 plus VEGF-A). (E) Averaged percent EC (VEC<sup>+</sup>CD31<sup>+</sup>) and sorted EC number at the end of phase 2 by basic treatment (Basic; BMP4 plus VEGF-A) with or without PLGF and/or HGF in phase 2. \**P*<0.05 and \*\**P*<0.01 vs Basic. (F) Averaged percent EC (VEC<sup>+</sup>CD31<sup>+</sup>) of each hESC (WA09[H9], H7, HuES-3) and hiPS line, induced by the combination treatment with BMP4/GSK-3 $\beta$ I in phase 1 and VEGF-A/DAPT in phase 2. NS, not significant.
