# Supplementary material for: Manipulation of a VEGF-Notch signaling circuit drives formation of functional vascular endothelial progenitors from human pluripotent stem cells
Source: PubMed Central journal article supplement — Cell Res. 2014 May 9;24(7):820–41. doi: 10.1038/cr.2014.59 (PMC4085760; doi:10.1038/cr.2014.59), 2014-05-09
Supplement: cr201459x3.pdf [file cr201459x3.pdf]

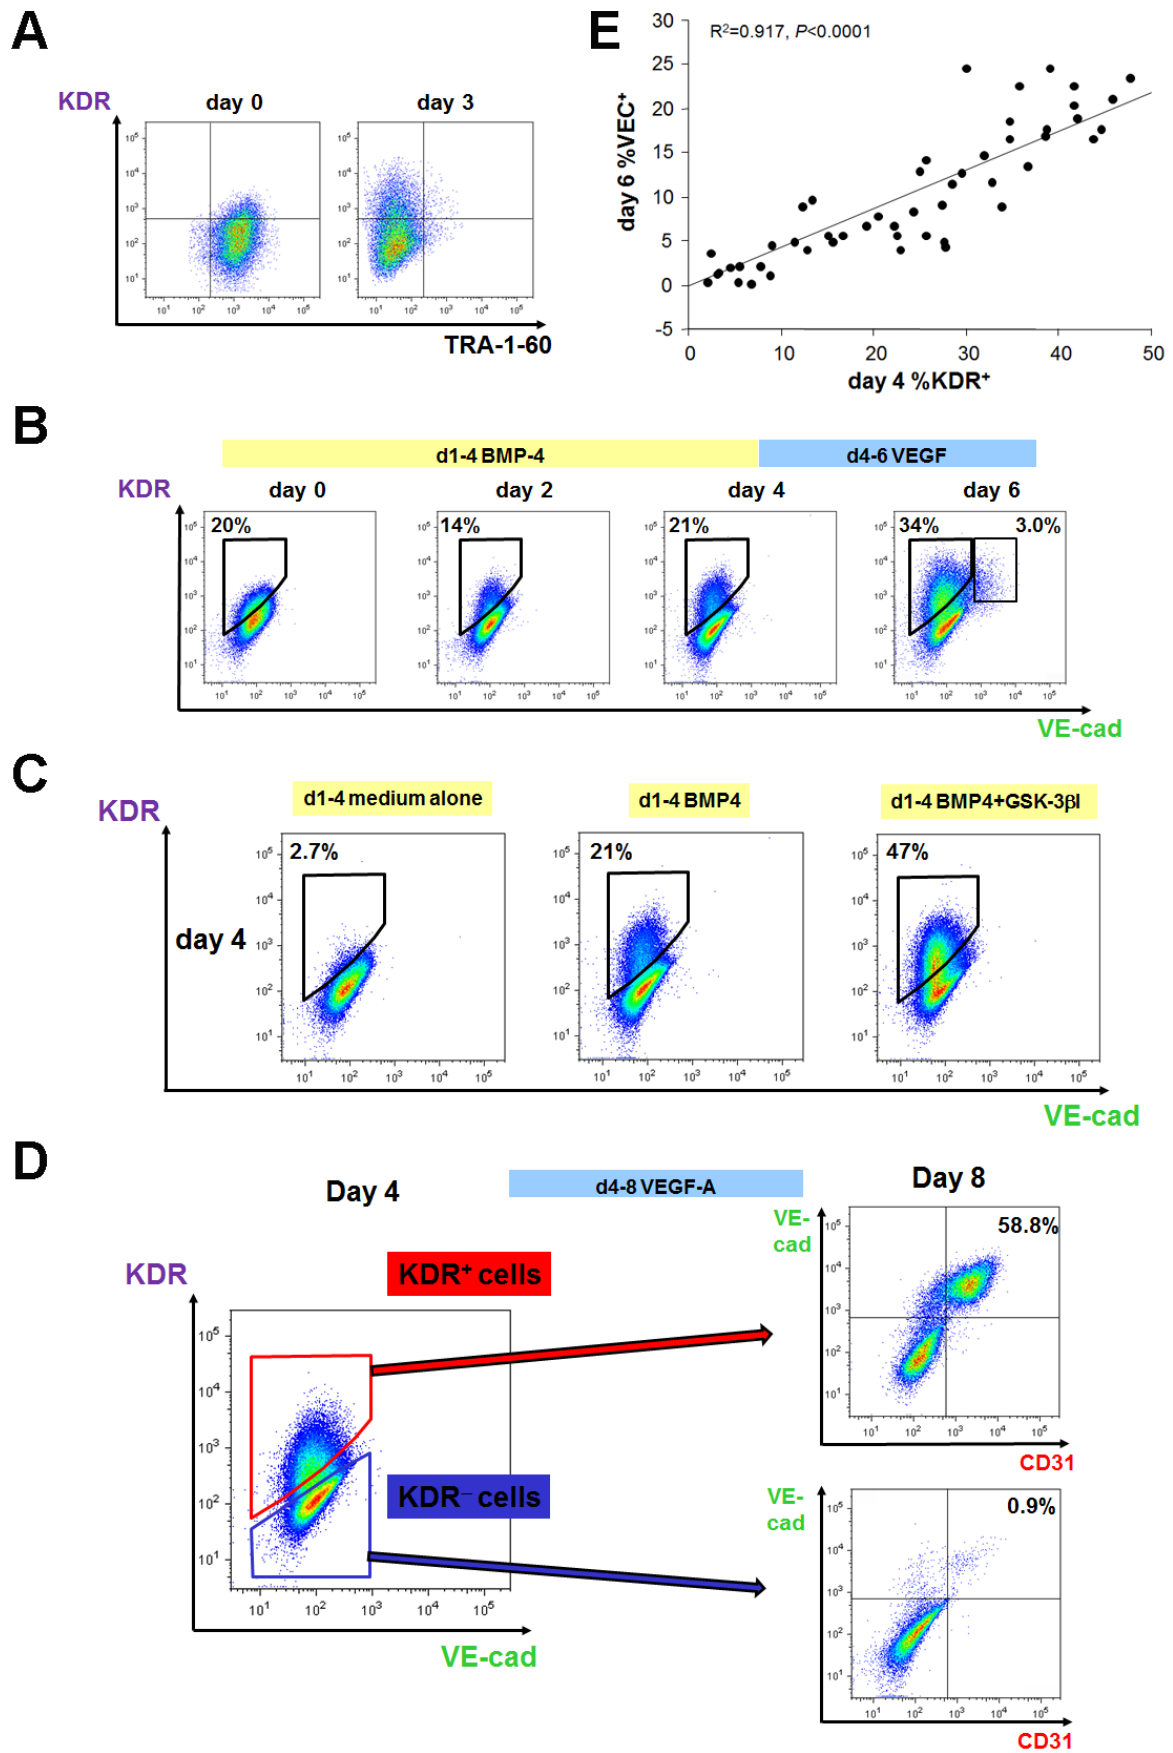

Supplementary information, Figure S3 FACS analyses of KDR expression in the

differentiated hESCs into endothelial lineage cells.

**(A)** Expression of KDR and TRA-1-60 on day 0 and 3. The undifferentiated hESCs (day 0) were positive for TRA-1-60 and showed partial and weak expression of KDR, whereas the differentiated hESCs (day 3) were negative for TRA-1-60 and showed partial but strong expression of KDR. **(B)** Time course of expression of KDR and VEC in the endothelial differentiation induced with BMP4 and VEGF-A. During mesodermal specification (day 0 to 4), the KDR<sup>+</sup> cell ratio was decreased once and then increased with stronger intensity. VEC<sup>+</sup> cells did not appear by day 4 but was induced with VEGF-A treatment on day 5–6. **(C)** Comparison of the KDR<sup>+</sup> cell ratios on day 4 induced with each treatment: medium alone, BMP4, and BMP4 plus GSK-3 $\beta$ I. **(D)** The EC (VEC<sup>+</sup>CD31<sup>+</sup>) induction ratios derived from KDR<sup>+</sup> and KDR<sup>-</sup> cell populations sorted on day 4. The sorted cells were then treated with VEGF-A and analyzed by FACS on day 8. **(E)** Positive correlation between the KDR<sup>+</sup> cell ratio on day 4 and the VEC<sup>+</sup> cell ratio on day 6 in the endothelial differentiation.
