# Supplementary material for: Manipulation of a VEGF-Notch signaling circuit drives formation of functional vascular endothelial progenitors from human pluripotent stem cells
Source: PubMed Central journal article supplement — Cell Res. 2014 May 9;24(7):820–41. doi: 10.1038/cr.2014.59 (PMC4085760; doi:10.1038/cr.2014.59), 2014-05-09
Supplement: cr201459x4.pdf [file cr201459x4.pdf]

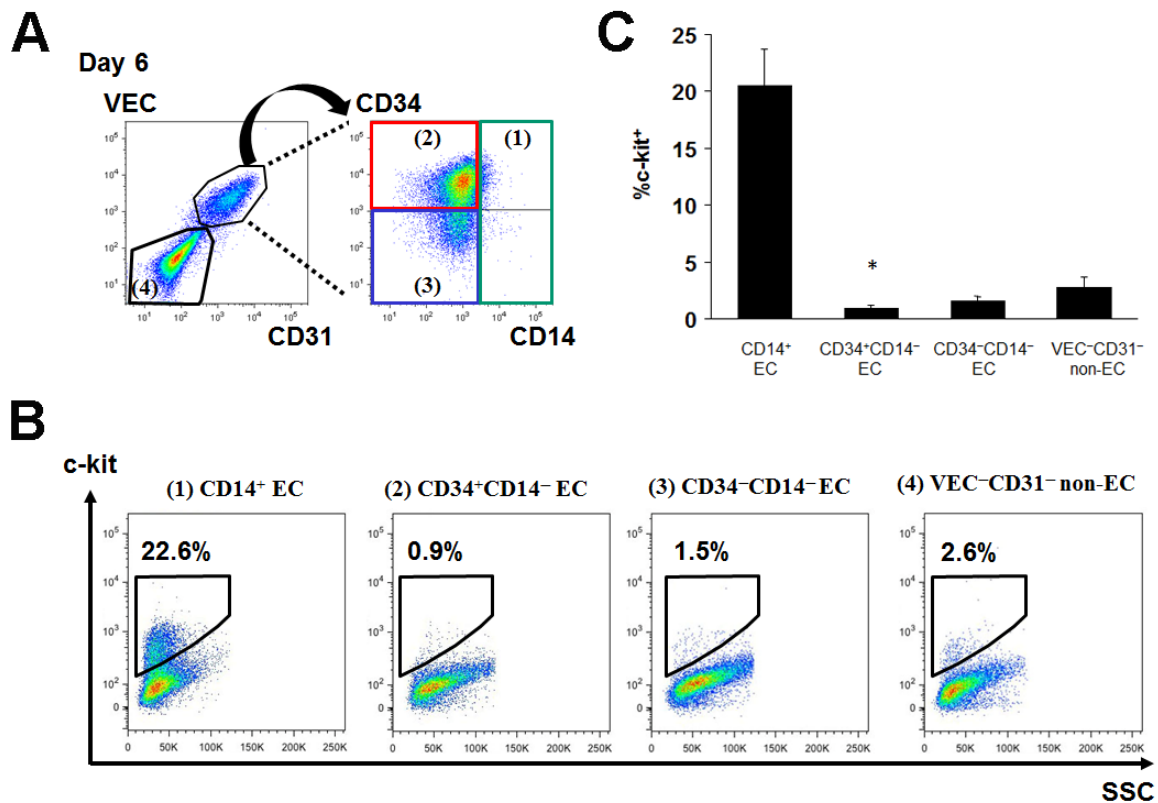

**Supplementary information, Figure S4** The VEC<sup>+</sup>CD31<sup>+</sup>CD34<sup>+</sup>CD14<sup>-</sup> population contains less number of c-kit<sup>+</sup> hemogenic endothelial cells.

(A) On day 6 of the hPSC differentiation, the 3 EC subpopulations among VEC<sup>+</sup>CD31<sup>+</sup> cells ((1) CD14<sup>+</sup>; (2) CD34<sup>+</sup>CD14<sup>-</sup>; (3) CD34<sup>-</sup>CD14<sup>-</sup>) and non-ECs ((4) VEC<sup>-</sup>CD31<sup>-</sup>) were sorted separately with FACS. (B) The positive expression pattern of c-kit in each subpopulation in A was examined with FACS analyzing the same number of cells ( $3 \times 10^4$ ). SSC, side scatter. (C) Quantitative results of the c-kit-positive ratios in each subpopulation in A. As shown, the CD14<sup>+</sup> EC subpopulation contained much higher number of c-kit-positive cells ( $20.4 \pm 3.3\%$ ), while the CD34<sup>+</sup>CD14<sup>-</sup> EC subpopulation contained fewer number of c-kit-positive cells ( $0.9 \pm 0.3\%$ ). \* $P < 0.05$  vs CD14<sup>+</sup> EC. Error bars, s.d. ( $n \geq 3$ ).
