# Supplementary material for: Manipulation of a VEGF-Notch signaling circuit drives formation of functional vascular endothelial progenitors from human pluripotent stem cells
Source: PubMed Central journal article supplement — Cell Res. 2014 May 9;24(7):820–41. doi: 10.1038/cr.2014.59 (PMC4085760; doi:10.1038/cr.2014.59), 2014-05-09
Supplement: cr201459x5.pdf [file cr201459x5.pdf]

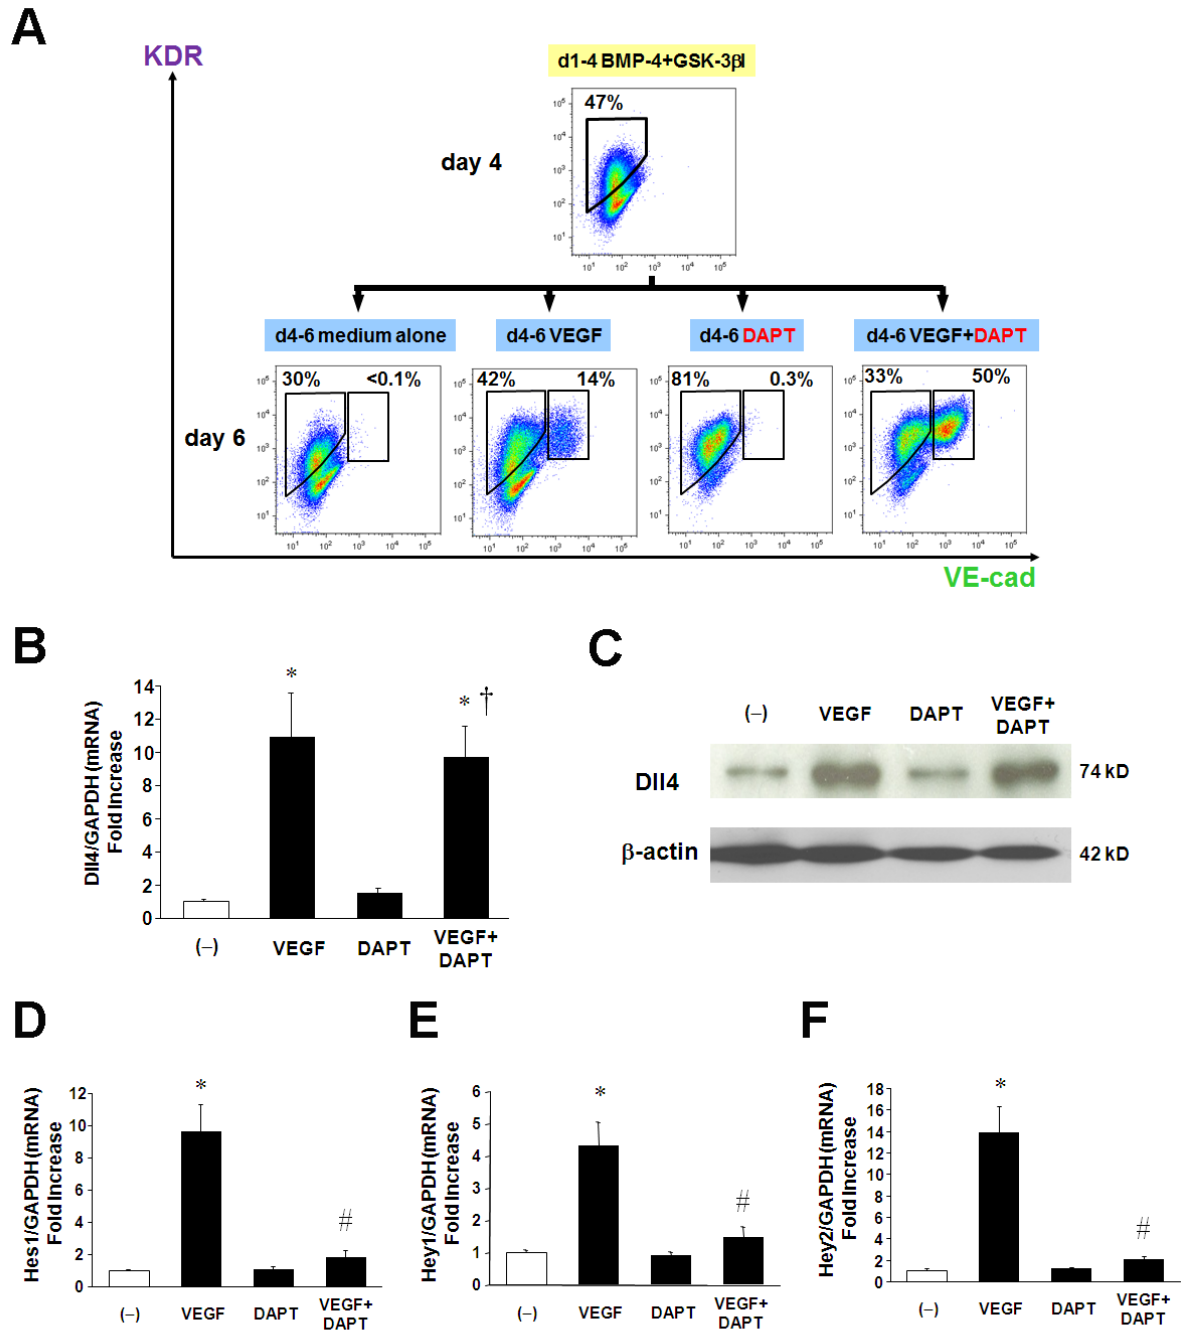

**Supplementary information, Figure S5** VEGF-A activates a Dll4/Notch signaling with upregulation of Notch downstream target genes.

(A) Expression of KDR on day 4 and 6 of the differentiated hESCs treated with VEGF-A and/or DAPT in phase 2. DAPT with or without VEGF-A significantly enhanced the KDR<sup>+</sup> cell ratio, compared with medium and VEGF alone. (B) Quantitative RT-PCR result of the

Dll4 mRNA expression in the differentiated hESCs treated with VEGF-A and/or DAPT. (C) A representative result of Western blot analysis for Dll4 in the differentiated hESCs. VEGF-A upregulated the Dll4 expression in mRNA (B) and protein (C) levels, and DAPT did not block the VEGF-A-induced upregulation of Dll4. \* $P < 0.01$  vs (-) (no molecules), † $P = \text{NS}$  vs VEGF-A. (D, E, and F) Quantitative RT-PCR results of Notch downstream target genes, Hes1 (D), Hey1 (E), and Hey2 (F) in the differentiated hESCs. Similarly, VEGF-A upregulated these Notch downstream target genes, whereas DAPT significantly attenuated the VEGF-A-induced upregulation of these genes. \* $P < 0.01$  vs (-), # $P < 0.01$  vs VEGF-A.
