# Supplementary material for: Manipulation of a VEGF-Notch signaling circuit drives formation of functional vascular endothelial progenitors from human pluripotent stem cells
Source: PubMed Central journal article supplement — Cell Res. 2014 May 9;24(7):820–41. doi: 10.1038/cr.2014.59 (PMC4085760; doi:10.1038/cr.2014.59), 2014-05-09
Supplement: cr201459x6.pdf [file cr201459x6.pdf]

**A**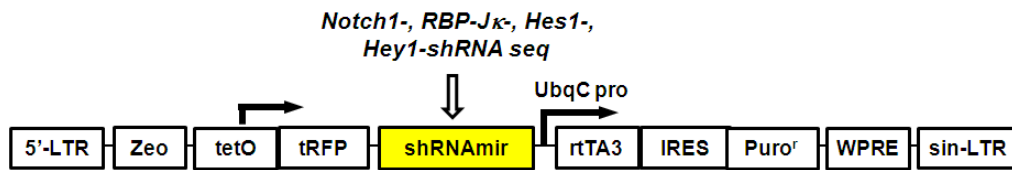**B**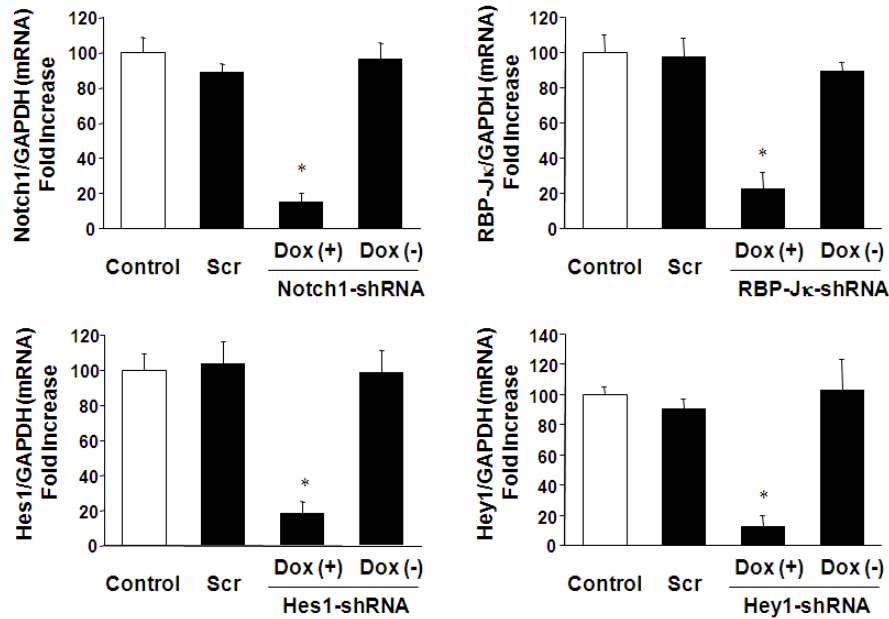

**Supplementary information, Figure S6** Genetical knockdown of the Notch signaling using tetracycline-inducible shRNA lentiviral vectors.

(A) Schematic of a pTRIPZ-based lentiviral vector construct. Under the existence of doxycycline, the expression of shRNA is induced properly. The cells expressing shRNAmir (microRNA-adapted shRNA) concurrently express turbo RFP (tRFP) and thereby can be easily discriminated from cells non-expressing shRNA. (B) Quantitative RT-PCR results validating the tetracycline-inducible knockdown effects for the expression of Notch1, RBP-J $\kappa$ , Hes1 and Hey1 in each shRNA-transduced hESC, respectively. Scr, non-targeting shRNA with a scramble sequence. \* $P < 0.0001$  vs control.
