# Supplementary material for: Manipulation of a VEGF-Notch signaling circuit drives formation of functional vascular endothelial progenitors from human pluripotent stem cells
Source: PubMed Central journal article supplement — Cell Res. 2014 May 9;24(7):820–41. doi: 10.1038/cr.2014.59 (PMC4085760; doi:10.1038/cr.2014.59), 2014-05-09
Supplement: cr201459x8.pdf [file cr201459x8.pdf]

**A**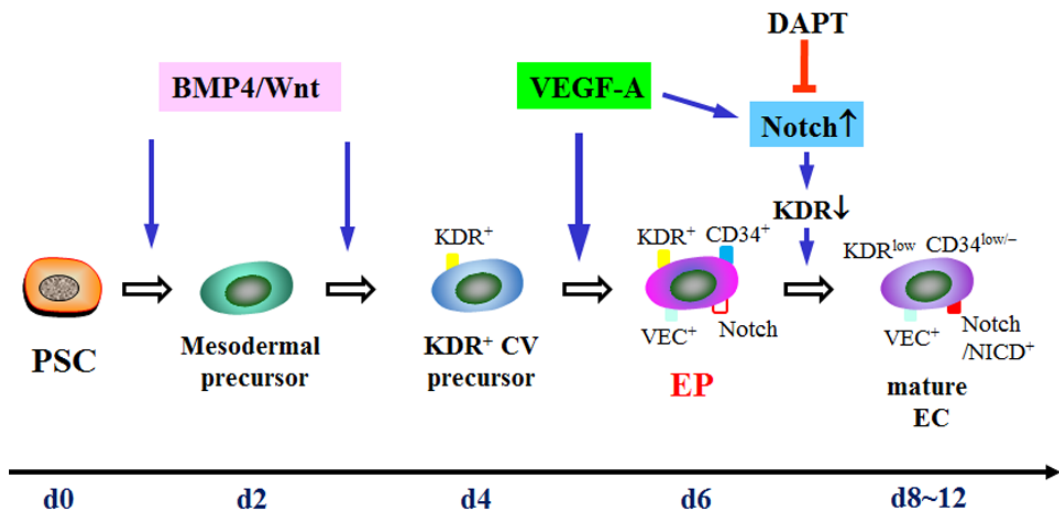**B**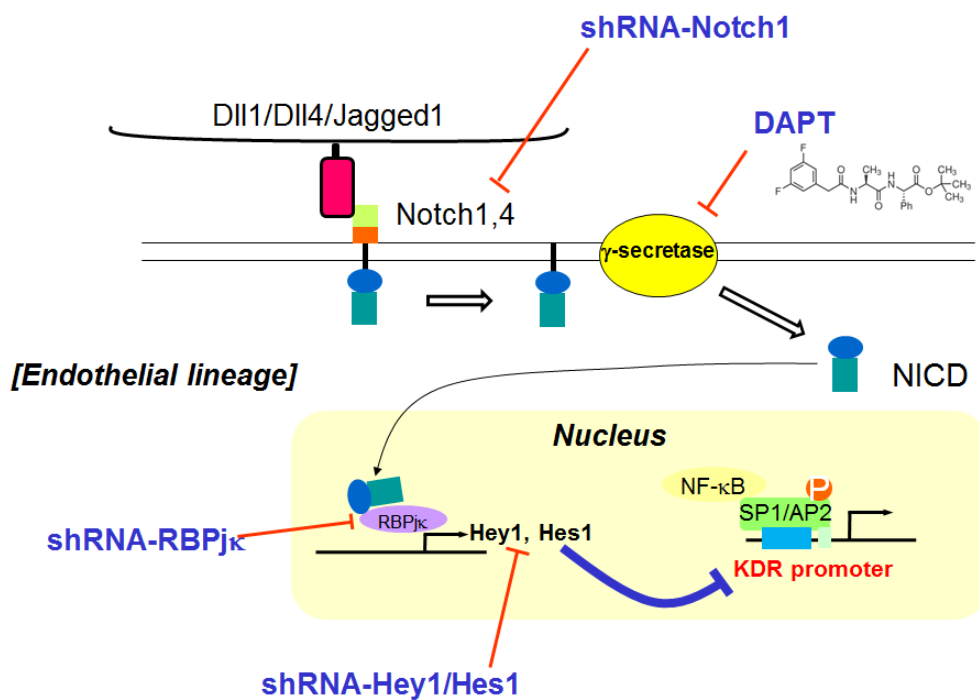

**Supplementary information, Figure S8** Schematic of the cellular pathway for hPSC differentiation into endothelial lineage cells and machinery mechanisms of Notch signaling inhibition maintaining the KDR promoter activity.

(A) The schematic cascade of hPSC-derived KDR<sup>+</sup> precursors' differentiation into endothelial lineage cells, including EPs and mature ECs. VEGF-A is essential for endothelial

differentiation derived from KDR<sup>+</sup> precursors but concurrently attenuated the KDR activity in the differentiated cells through the Notch signaling, resulting in the maturation of the differentiated endothelial lineage cells (KDR<sup>low</sup>, CD34<sup>low/-</sup>). By blocking the function of the Notch signaling, DAPT in combination with VEGF-A promotes the induction of KDR<sup>+</sup> precursor-derived EPs. **(b)** Schematic of machinery mechanisms by which DAPT or genetical knockdown of Notch signaling with shRNA maintains the KDR promoter activity. NICD, Notch intracellular domain.
