# Supplementary material for: Manipulation of a VEGF-Notch signaling circuit drives formation of functional vascular endothelial progenitors from human pluripotent stem cells
Source: PubMed Central journal article supplement — Cell Res. 2014 May 9;24(7):820–41. doi: 10.1038/cr.2014.59 (PMC4085760; doi:10.1038/cr.2014.59), 2014-05-09
Supplement: cr201459x9.pdf [file cr201459x9.pdf]

**Supplementary information, Table S1** List of bioactive small molecules examined for their effects on hESC-derived EC differentiation

### 1. Growth factors and Cytokines:

|                            |                                     |
|----------------------------|-------------------------------------|
| EGF [10 ng/mL]             | Angiopoietin-1 [100 ng/mL]          |
| IGF-1 [50 ng/mL]           | Erythropoietin [10 ng/mL]           |
| IGF-BP1 [100 ng/mL]        | Endostatin [1 µg/mL]                |
| SDF-1 [40 ng/mL]           | G-CSF [1 µg/mL]                     |
| HGF [40 ng/mL]             | GM-CSF [5 ng/mL]                    |
| PLGF [25 ng/mL]            | cAMP [1 mM]                         |
| PDGF-AA, -BB [10 ng/mL]    | cGMP [100 µM]                       |
| bFGF [8 ng/mL]             | BMP2 [20 ng/mL]                     |
| FGF-4, -10, -16 [25 ng/mL] | BMP4 [20 ng/mL]                     |
| VEGF-A [50 ng/mL]          | Activin A [10 ng/mL]                |
| VEGF-B, -C [0.1–1.0 µg/mL] | TNF-α [20 ng/mL]                    |
| TGF-β1, -β2 [5 ng/mL]      | IL-1a, 6, 8, 10, -12 [1.0–10 ng/mL] |
| β-NGF [100 ng/mL]          | IP-10 [200 ng/mL]                   |
| CTGF [25 ng/mL]            | TIMP-2 [1 µg/mL]                    |
| SCGF-α, -β [100 ng/mL]     | IFN-γ [10 ng/mL]                    |

### 2. Signaling pathway inhibitors/enhancers:

|                                                                     |
|---------------------------------------------------------------------|
| TGFβ receptor inhibitor (SB431542) [10 µM]                          |
| Wnt signaling inhibitor (dkk-1) [25 ng/mL]                          |
| Wnt signaling enhancer (Wnt-3a) [1 µg/mL]                           |
| BMP signaling inhibitor (Noggin) [100 ng/mL]                        |
| PI3-Kinase inhibitor (LY294002) [10 µM]                             |
| Notch signaling inhibitor (DAPT) [10 µM]                            |
| Notch signaling enhancer (rhJagged1/Delta-like ligand-4) [50 ng/mL] |
| GSK-3β inhibitor (Bio/CP21R7) [1 µM/5 µM]                           |
| Insulin RTK activator (Demethylasterriquinone) [100 µM]             |
| ERK signaling inhibitor (PD98059) [10 µM]                           |
| JNK signaling inhibitor (SP600125) [1 µM]                           |
| p38 MAPK signaling inhibitor (SB203580) [10 µM]                     |
| JNK/SAPK/p38 MAPK activator (Anisomycin) [50 ng/mL]                 |
| Selective JAK3 inhibitor (ZM449829) [50 µM]                         |
| STAT signaling inhibitor (Cucurbitacin I) [100 ng/mL]               |
| IL-1 receptor antagonist (rhIL-1Ra) [1 µg/mL]                       |
| Hedgehog signaling enhancer (Purmorphamine) [1 µM]                  |
| Hedgehog signaling inhibitor (Cyclopamine) [5 µM]                   |
| mTOR inhibitor (Rapamycin) [100 ng/mL]                              |
| JAK2, Flt3 and TrkA inhibitor (Lestaurtinib) [1–100 µM]             |
| VEGF receptor inhibitor (Suramine) [100 µg/mL]                      |
