# Supplementary material for: Manipulation of a VEGF-Notch signaling circuit drives formation of functional vascular endothelial progenitors from human pluripotent stem cells
Source: PubMed Central journal article supplement — Cell Res. 2014 May 9;24(7):820–41. doi: 10.1038/cr.2014.59 (PMC4085760; doi:10.1038/cr.2014.59), 2014-05-09
Supplement: cr201459x10.pdf [file cr201459x10.pdf]

**Supplementary information, Table S2** Serum/Feeder-Free Culture Methods for hPSCs differentiation into endothelial lineage cells

| Author               | Journal<br>(Year)                      | Differentiation<br>period | Embryoid<br>body<br>formation | Specific factors inducing ECs                               |                                                         | Definition of the<br>harvested EC (or<br>endothelial lineage)  | Harvest<br>method | Efficiency<br>(%EC per total<br>differentiating<br>cells) at<br>harvest | EC yield<br>derived from 1<br>PSC<br>(on day 5-6/<br>day12-14) | Proof of<br>in vivo<br>vascular<br>formation |
|----------------------|----------------------------------------|---------------------------|-------------------------------|-------------------------------------------------------------|---------------------------------------------------------|----------------------------------------------------------------|-------------------|-------------------------------------------------------------------------|----------------------------------------------------------------|----------------------------------------------|
|                      |                                        |                           |                               | Phase 1<br>(mesodermal<br>specification)                    | Phase 2<br>(vascular<br>commitment)                     |                                                                |                   |                                                                         |                                                                |                                              |
| Levenberg<br>S et al | Proc Natl<br>Acad Sci<br>USA<br>(2002) | 13 days                   | (+)                           |                                                             |                                                         | CD31 <sup>+</sup>                                              | FACS              | 2%                                                                      | undetermined                                                   | (-)                                          |
| Wang L et<br>al      | Immunity<br>(2004)                     | 10 days                   | (+)                           |                                                             | VEGF-A,<br>pituitary extract                            | CD31 <sup>+</sup> VE-cadherin <sup>+</sup>                     | FACS              | few                                                                     | undetermined                                                   | (-)                                          |
| Lu S et al           | Nat<br>Methods<br>(2007)               | 6 days                    | (+)                           | BMP4,<br>VEGF-A                                             | BMP4,<br>VEGF-A, SCF,<br>Flt3 ligand,<br>Thrombopoietin | Formation of a<br>hemangioblast<br>colony                      | manual            | 0.5%                                                                    | undetermined                                                   | (+)                                          |
| Goldman<br>O et al   | Stem Cells<br>(2009)                   | 12 days                   | (+)                           | BMP4, SCF,<br>Flt3 ligand,<br>IL3, IL6,<br>G-CSF,<br>VEGF-A | SCF, Flt3<br>ligand, IL3, IL6,<br>G-CSF,<br>VEGF-A      | VE-cadherin <sup>+</sup> KDR <sup>+</sup>                      | FACS              | 10%                                                                     | undetermined                                                   | (-)                                          |
| Bai H et<br>al       | J Cell<br>Biochem<br>(2010)            | 10-12 days                | (-)                           | BMP4, bFGF,<br>VEGF-A                                       | BMP4, bFGF,<br>VEGF-A                                   | CD31 <sup>+</sup> (or CD31 <sup>+</sup><br>CD34 <sup>+</sup> ) | FACS/MACS         | 10.7%                                                                   | 0.2/0.3                                                        | (-)                                          |

|                           |                                |                      |     |                          |                                               |                                                                                     |             |            |                                       |            |
|---------------------------|--------------------------------|----------------------|-----|--------------------------|-----------------------------------------------|-------------------------------------------------------------------------------------|-------------|------------|---------------------------------------|------------|
| James D<br>et al          | Nat<br>Biotechnol<br>(2010)    | 14 days<br>(20 days) | (+) | BMP4,<br>Activin-A,      | VEGF-A, bFGF,<br>TGFβI                        | CD31 <sup>+</sup> VE-cadherin <sup>+</sup>                                          | MACS        | 1.8%       | unknown/1.2<br>(7.2 on day 20)        | (+)        |
| Tatsumi R<br>et al        | Cell<br>Transplant<br>(2011)   | 5 days               | (-) | GSK-3βI                  | VEGF-A                                        | VE-cadherin <sup>+</sup>                                                            | MACS        | 20%        | 0.2/unknown                           | (-)        |
| Adams<br>WJ et al         | Stem Cell<br>Reports<br>(2013) | 10 days              | (+) | *20% fetal<br>calf serum | *20% fetal calf<br>serum                      | CD31 <sup>+</sup> VE-cadherin <sup>+</sup>                                          | MACS/FACS   | 18%        | undetermined                          | (-)        |
| <b>Sahara M<br/>et al</b> |                                | <b>6 days</b>        | (-) | <b>BMP4,<br/>GSK-3βI</b> | <b>VEGF-A,<br/>Notch inhibitor<br/>(DAPT)</b> | <b>CD31<sup>+</sup>VE-cadherin<sup>+</sup><br/>CD34<sup>+</sup>CD14<sup>-</sup></b> | <b>FACS</b> | <b>50%</b> | <b>2.5/20<br/>(140 on day<br/>20)</b> | <b>(+)</b> |
