# Supplementary material for: Manipulation of a VEGF-Notch signaling circuit drives formation of functional vascular endothelial progenitors from human pluripotent stem cells
Source: PubMed Central journal article supplement — Cell Res. 2014 May 9;24(7):820–41. doi: 10.1038/cr.2014.59 (PMC4085760; doi:10.1038/cr.2014.59), 2014-05-09
Supplement: cr201459x11.pdf [file cr201459x11.pdf]

**Supplementary information, Table S3 Primers sequence list**

| Gene          | sense primer (5' to 3') | antisense primer (5' to 3') |
|---------------|-------------------------|-----------------------------|
| <i>CD14</i>   | GTTCGGAAGACTTATCGACCAT  | ACAAGGTTCTGGCGTGGT          |
| <i>Dll4</i>   | CCCTGGCAATGTACTTGTGAT   | GTGGTGGGTGCAGTAGTTGA        |
| <i>Hey1</i>   | AGGGTGGGATCAGTGTGC      | TGCTTCTCAAAGGCACTG          |
| <i>Hey2</i>   | GAGGCAGTGATGACATCC      | CCCTGATGGCATCCGAAGAGC       |
| <i>Hes1</i>   | GAAGCACCTCCGGAACCT      | GTCACCTCGTTCATGCACTC        |
| <i>Notch1</i> | CGCACAAGGTGTCTTCCAG     | AGGATCAGTGGCGTCGTG          |
| <i>RBP-Jκ</i> | GAAGTACCATGGCGTGGATT    | TTGATCCCCTCGCTCTTTTA        |
| <i>GAPDH</i>  | AGCCACATCGCTCAGACAC     | GCCCAATACGACCAAATCC         |
